# Supplementary material
Source: MDPI journal article supplement (https://www.mdpi.com/2071-1050/12/1/384)
Supplement: s1 [file s1]

Archive with 2 entries (2 files):
- Supplementary Table S2.xls
- Supplementary material 1.pdf
