# Supplementary material
Source: MDPI journal article supplement (https://www.mdpi.com/2071-1050/12/1/384)

## Supplementary material 1

Monitoring data from the INRA CLIMATIK platform (<https://intranet.inra.fr/climatik/>, in French) managed by the AgroClim laboratory of Avignon, France.

### 1. Total rainfall during the growing season 2013-2014

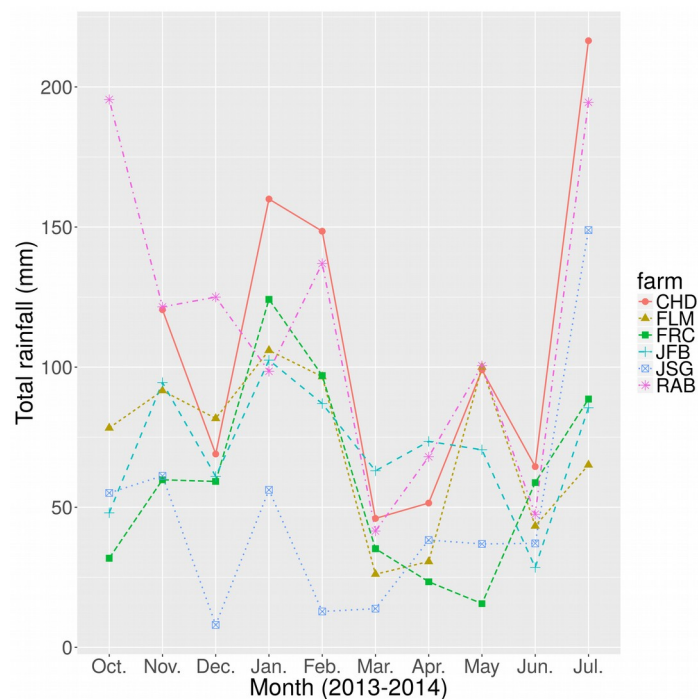

### 2. Mean temperatures during the growing season 2013-2014

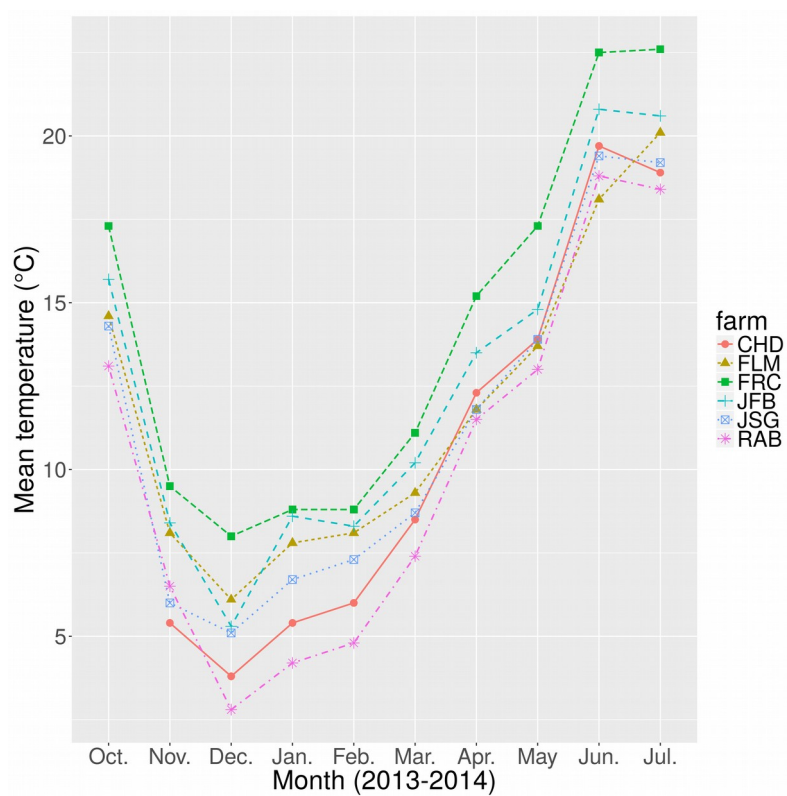

3. Total rainfall during the growing season 2014-2015

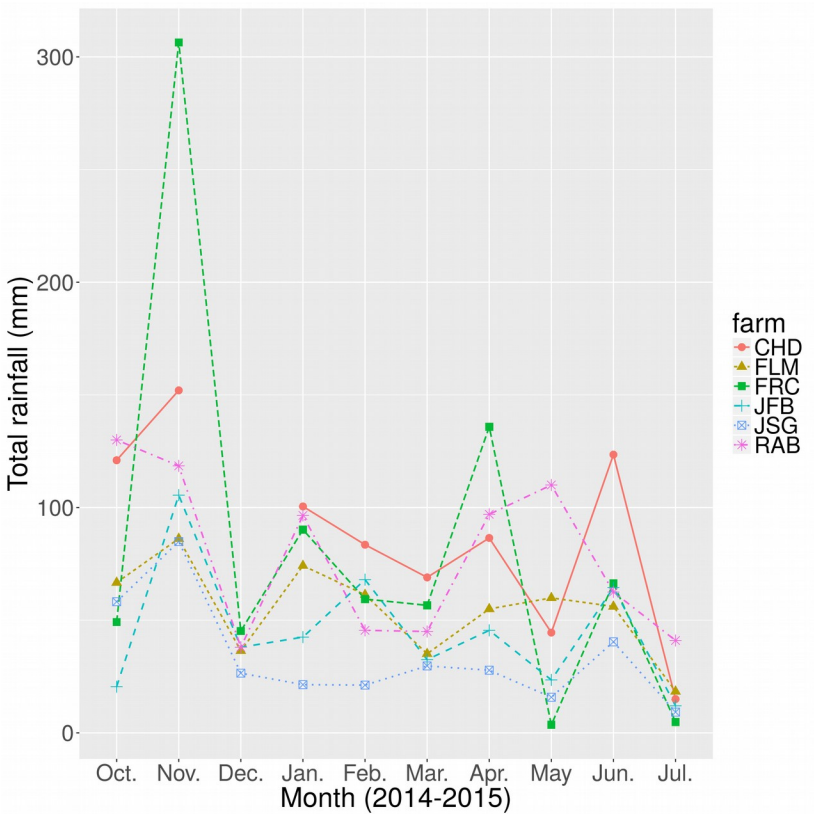

4. Mean temperatures during the growing season 2014-2015

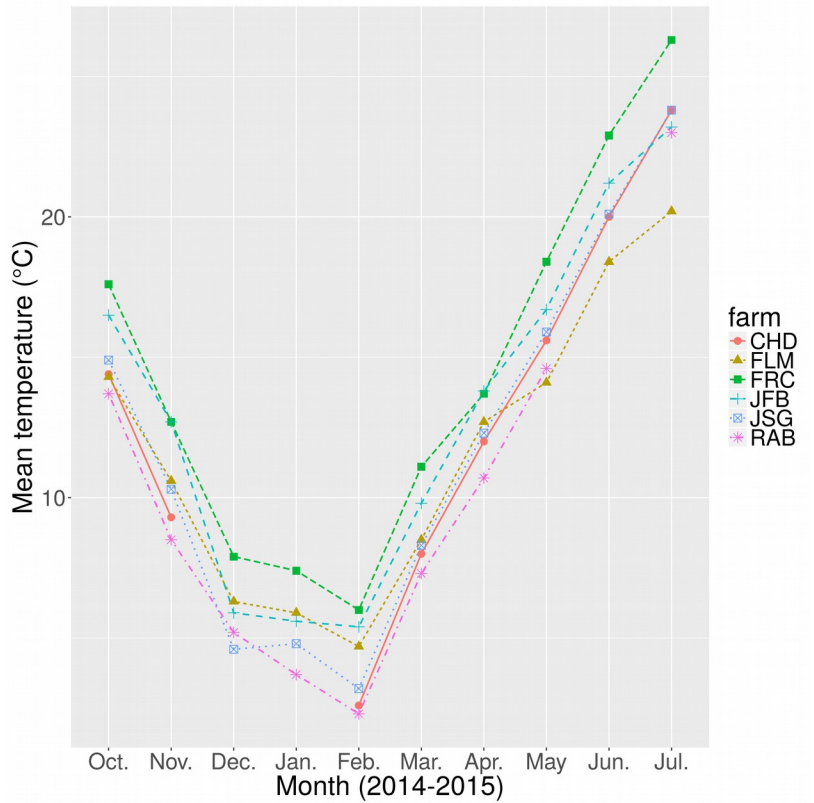

Supplement: s1 [file s1 › Supplementary material 1.pdf]
