# Supplementary material
Source: MDPI journal article supplement (https://www.mdpi.com/2071-1050/12/1/384)
Supplement: s1 [file s1 › Supplementary Table S2.xls]

## Sheet: moyennesSD_ferme_annee
Variety	Farm	Year	Plant Height (mm)		LLSD (mm)		Awness		Spike Colour		Spike Curve		Spike Length (mm)		Spike Weight (g)		Number of spikelet / spike		Proportion of sterile spikelet / spike		Thousand Kernel Weight (g)		Protein content (%)		Number of grains per m²		Grain Yield (qx/ha)
			Mean	Std. Dev.	Mean	Std. Dev.	Mean	Std. Dev.	Mean	Std. Dev.	Mean	Std. Dev.	Mean	Std. Dev.	Mean	Std. Dev.	Mean	Std. Dev.	Mean	Std. Dev.	Mean	Std. Dev.	Mean	Std. Dev.	Mean	Std. Dev.	Mean	Std. Dev.
Dauphibois	CHD	2014	1133.82	137.24	264.66	60.32	10.1	8.3	9.3	5.05	9.2	3.69	93.42	14.96	2.11	0.56	18.96	3.04	0.15	0.06	47.16	1.4	11.73	0.41	3896.69	334.19	18.4	2.12
Dauphibois	CHD	2015	1075.43	117.79	244.04	57.7	10.1	7.66	8.4	6.88	6	4.16	89.53	14.67	1.83	0.67	19.52	1.9	0.23	0.09	50.41	1.52	10.76	0.34	5548.14	394.12	28	2.83
Dauphibois	FLM	2014	1208.88	123.11	293.94	58.73	10.2	7.89	8.9	8.1	10	4.4	96.76	12.78	2.31	0.64	20.46	2.02	0.15	0.06	46.81	3.47	9.33		3048.66	740.94	14.4	4.53
Dauphibois	FLM	2015	1407.04	111.5	299.44	52.98	11.4	9.37	10.7	5.35	8.7	5.61	104.4	18.69	1.98	0.64	21.28	1.9	0.2	0.08	47.87	1.21	9.28	0.21	4414.61	229.47	21.12	0.57
Dauphibois	FRC	2014	1069.33	128.29	236.06	74.38	9.7	7.45	11	9.04	7.7	5.17	95.92	17.64	1.89	0.95	20.3	1.92	0.22	0.11	43.13	4.83	9.6	2.38	2462.74	11.22	10.62	1.24
Dauphibois	FRC	2015	807	120.25	184.29	62.47	13.7	6.98	8.1	5.52	5.4	4.38	81.79	14.26	1.39	0.46	16.24	2.04	0.2	0.07	39.3	0.13
Dauphibois	JFB	2014	1178.22	132.09	299.68	58.2	11.63	8	9.9	6.25	10.1	4.73	102	18.31	2.18	0.76	20.08	2.88	0.17	0.08	43.65	2.13	11.1	0.54	5088.5	596.76	22.15	1.52
Dauphibois	JFB	2015	1327.88	111.41	250.84	53.35	7.6	8.1	6.2	5.3	8.2	4.71	92.32	13.17	2.13	0.64	21.38	2.11	0.2	0.07	50.72	0.62	7.67	0.22	7175.26	135.22	36.4	1.13
Dauphibois	JSG	2014	1421.87	123.71	230.93	80.89	7.6	7.55	10.27	7.39	9.4	5.13	111.25	23.55	2.23	0.72	21.89	2.5	0.16	0.06	47.09	1.55	12.18	1.47	8430.58	794.34	39.77	4.88
Dauphibois	JSG	2015	1309.29	114.83	88.01	13.48	8.53	8.49	7.93	4.51	6.87	3.92	88.73	12.05	1.71	0.51	19.95	1.99	0.22	0.06	47.51	0.9	8.81	0.2	7024.48	1030.03	33.42	5.34
Dauphibois	RAB	2014	1604.38	131.39	312.66	90.48	10.33	8.84	4.24	6.75	10	5.68	116.38	18.61	2.47	0.58	22.98	2.56	0.14	0.06	45.72	0.1	13.75	0.89	8580.23	465.43	39.22	2.04
Dauphibois	RAB	2015	1386.58	133.76	305.5	44.49	10.3	7.59	9	3.91	6.2	4.11	98.82	15.67	2.68	0.72	20.8	1.91	0.15	0.07	54.47	1.4	9.94	0.37	5422.18		29
Hendrix	CHD	2014	675.34	43.3	85.92	18.95	19.8	0.99	2.5	2.53	13.7	4.61	91.54	9.24	2.55	0.54	19.36	2.24	0.16	0.06	47.34	1.04	11.42	0.82	3350.11	1149.22	15.8	5.09
Hendrix	FLM	2014	633.12	46.9	82.44	25.61	17.6	3.07	1.4	2.27	11.9	3.63	89.12	12.73	2.5	0.76	19.58	2.14	0.15	0.07	41.81	0.18	9.16		1995.67	650.93	8.35	2.76
Hendrix	FLM	2015	821.3	52.32	109.18	24.28	20	0	3.8	2.16	12.7	4.07	90.02	11.26	2.24	0.63	20.48	0.97	0.19	0.06	44.04	3.1	8.2	0.21	6641	1159.76	29.43	7.17
Hendrix	FRC	2014	606.94	83.21	67.96	26.6	18.2	3.31	2	2.67	9.3	4.85	83.16	14.05	2.21	0.91	19.74	2.12	0.17	0.1	40.47	0.56	10.35	0.64	2175.28	383.88	8.81	1.68
Hendrix	FRC	2015	452.9	56.38	44.7	25.57	19.2	1.85	0.4	1.37	5.3	3.97	62.24	10.43	1.18	1.51	15.62	2.43	0.28	0.09	33.71	1.47
Hendrix	JFB	2014	687.62	57.73	73.96	26.3	20	0	9.69	2.96	16.43	4.08	104.41	14.46	2.89	0.84	21.16	2.26	0.1	0.08	38.63	1.08	10.96	0.21	4192.45	2894.11	16.35	11.63
Hendrix	JFB	2015	709.36	39.48	69.48	12.67	19.2	1.85	2.5	2.53	11.3	4.93	79.26	5.94	2.36	0.5	21.39	1.43	0.2	0.05	45.57	2.41	6.79	0.17	7795.37	611.23	35.6	4.67
Hendrix	JSG	2014	824.83	40.48	92.04	27.53	17.5	3.44	3.38	3.32	6.89	4.66	98.22	9.27	2.81	0.58	21.01	1.72	0.15	0.05	46.83	2.45	10.62	0.31	12145	1898.21	56.67	7.41
Hendrix	JSG	2015	764.87	61.14	80.19	6.12	20	0	2.4	3.42	9.47	3.14	80.19	6.12	2.19	0.48	19.89	0.97	0.21	0.04	45.39	0.99	7.61	0.17	9389.79	2389.74	42.52	10.17
Hendrix	RAB	2014	904.7	46.38	106.1	33.27	18.1	3.01	2.9	3.51	14.8	4.94	102.76	12.11	2.6	0.66	21.52	2.85	0.15	0.05	42.78	1.21	13.3	1.4	12959.9	1837.7	55.56	9.43
Hendrix	RAB	2015	769.76	47.56	81.06	15.79	19	2.02	1.3	2.22	4.6	3	89.22	4.56	2.37	0.31	20.9	0.86	0.18	0.05	42.12	1.45	7.67	0.66	7127.63		30.75
Japhabelle	CHD	2014	1039.74	82.05	226.8	46.18	14.89	8.04	6.28	4.72	11.28	4.94	95.82	17.35	2.36	0.62	19.64	3.29	0.15	0.08	46.46	0.42	11.51	0.62	4253.71	601.84	19.75	2.62
Japhabelle	CHD	2015	1047.98	121.24	249.73	43.22	12.6	7.71	6	5.35	6.2	3.85	88.7	13.12	2.08	0.71	20.12	2.3	0.2	0.09	48.68	0.47	10.56	0.25	5749.35	524.99	28	2.83
Japhabelle	FLM	2014	1080.1	81.82	252.12	45.02	10.61	7.33	9.59	8.41	12.86	4.68	98.18	16.22	2.23	0.62	21.4	2.86	0.17	0.06	43.29	0.42	9.71	0.36	3554.15	716.71	15.4	3.25
Japhabelle	FLM	2015	1283.62	116.65	255.32	42.48	11.8	8.32	7.5	5.82	10.8	4.09	100.88	16.02	1.94	0.68	21.7	2.57	0.2	0.08	45.26	0.47	9.66	0.31	5534.01	257.83	25.04	0.91
Japhabelle	FRC	2014	999.36	138.65	199.82	54.2	11.3	8.44	8.8	7.11	8.8	4.9	96.84	17.82	2.2	1.09	19.82	2.46	0.17	0.09	43.29	1.35	11.38	0.49	2076.96	131.21	9	0.85
Japhabelle	FRC	2015	738.31	98.52	138.08	52.04	10	7.22	6.22	4.84	4.69	3.6	78.24	14.26	1.3	0.58	16.96	2.23	0.2	0.08	35.63	2.26
Japhabelle	JFB	2014	1132.38	107.59	234.24	68.84	13.9	7.97	8.9	5.47	12.4	4.54	112.18	16.13	2.78	0.7	22.4	2.69	0.11	0.06	41.87	2.43	11.14	0.52	4320.83	634.85	18.01	1.61
Japhabelle	JFB	2015	1192.84	92.79	225.18	59.12	11.7	8.61	8.4	4.89	9.1	4.37	89.82	12.43	2.08	0.66	21.76	2.29	0.21	0.07	48.04	0.06	7.41	0.05	7180.6	491.11	34.5	2.4
Japhabelle	JSG	2014	1371.19	103.8	222.51	42.13	10.95	8.05	9.73	7.11	10.47	5.56	109.23	14.57	2.4	0.53	23.73	2.24	0.16	0.05	46.6	0.52	10.92	0.56	10793.5	1371.98	50.32	6.7
Japhabelle	JSG	2015	1222.09	88.64	92.83	10.53	13.67	8.36	9.47	5.36	8.2	3.73	92.83	10.53	1.73	0.47	21.01	2.02	0.23	0.06	46.18	1.85	9.03	0.68	7532.4	566	34.74	2.22
Japhabelle	RAB	2014	1478.3	92.17	283.8	64.26	13.33	7.67	6.77	5.6	11.35	5.33	113.1	19.45	2.54	0.58	23.38	2.66	0.17	0.04	47.44	1.87	12.73	0.73	9466.95	2626.07	44.67	10.69
Japhabelle	RAB	2015	1290.96	88.52	247.8	33.26	13.6	6.55	9.9	5.58	8.6	4.85	102.3	13.67	2.43	0.61	22.4	2.25	0.18	0.07	45.49	1.8	8.46	0.73	5614.13		26.25
Mélange-1-13 pops	CHD	2014	1086.64	84.66	241.32	62.3	9.5	8.03	5.3	3.7	9.7	6.1	97.46	20.05	2.29	0.85	19.56	2.43	0.14	0.07	49.35	0.79	11.55	0.48	4736.97	611.71	23.4	3.39
Mélange-1-13 pops	CHD	2015	1074.62	111.93	245.8	66.84	12.8	7.84	5.3	6.96	6.2	4.23	90.76	17.52	2.02	0.71	19.3	2.43	0.23	0.09	50.04	0.84	10.52	0.23	6983.73	1295.78	35	7.07
Mélange-1-13 pops	FLM	2014	1035.7	122.19	247.22	57.07	10.4	7.75	6.5	6	11.2	5.21	87.68	12	1.71	0.61	18.9	2.05	0.21	0.06	42.73	0.43	9.28	0.27	2186.64	325.42	9.35	1.48
Mélange-1-13 pops	FLM	2015	1336.5	119.54	260.65	57.98	11.33	8.4	5.61	7.33	9.9	5.05	101.24	13.46	1.91	0.57	21.18	1.62	0.21	0.07	46.38	2.18	9.99	0.12	5049.72	478.13	23.37	1.12
Mélange-1-13 pops	FRC	2014	1052.56	111.3	217.9	68.94	8.2	7.61	4.7	6.88	8	5.53	96.54	19.01	1.76	0.65	18.9	2.08	0.2	0.09	42.04	1.74	10.53	1.39	2722.77	489.68	11.49	2.53
Mélange-1-13 pops	FRC	2015	738.41	99.32	145.76	44.51	11.5	7.84	4.7	4.09	3.78	2.98	72.55	11.62	1.12	0.37	15.48	2.17	0.23	0.07	35.99	0.42
Mélange-1-13 pops	JFB	2014	1124.08	138.27	252.56	68.47	8	8.69	7.6	7.51	12.2	5.36	110.1	17.91	2.29	0.81	20.96	2.97	0.09	0.09	41.98	1.65	11.38	0.44	4197.6	799.16	17.56	2.66
Mélange-1-13 pops	JFB	2015	1286.22	71.81	248.24	47.45	8.2	7.87	4.8	5.8	8.6	3.92	89.35	12.69	1.98	0.57	20.82	2.27	0.21	0.07	49.98	0.49	8.16	0.02	7145.32	550.46	35.7	2.4
Mélange-1-13 pops	JSG	2014	1404.88	134.7	214.06	60.77	7.86	8.23	5.31	4.38	7.86	4.56	112.24	19.37	2.55	0.67	23.51	2.44	0.16	0.06	47.53	0.2	11.25	0.52	9137.74	3803.93	43.47	18.27
Mélange-1-13 pops	JSG	2015	1277.24	85.93	88.93	13.27	8.53	8.37	4	4.58	7.8	4.67	88.93	13.27	1.58	0.46	20.29	2.18	0.24	0.07	45.99	2.05	9.54	0.67	7232.79	818.64	33.38	5.15
Mélange-1-13 pops	RAB	2014	1541.88	113.39	314.24	58.32	10.21	6.52	3.23	5.21	6.77	4.78	111.34	19.84	2.52	0.59	21.94	2.44	0.16	0.07	47.61	1.61	12.26	0.05	5323.94	179.96	25.33	0
Mélange-1-13 pops	RAB	2015	1431.24	80.54	286.76	51.52	9.3	6.62	5.3	4.99	7.8	4.06	102.06	19.47	2.43	0.52	21.78	2.32	0.16	0.05	48.53	1.79	8.15	0.3	6259.04		29.58
Mélange-5-Bourguignonnes	CHD	2014	1231.94	87.58	320.56	73.89	9.6	6.69	5.1	4.34	5.1	4.34	97.3	13.21	2.22	0.52	18.94	2.19	0.13	0.06	47.89	0.51	11.39	0.33	4789.87	347.28	22.95	1.91
Mélange-5-Bourguignonnes	CHD	2015	1115.76	113.36	289.06	62.75	6.73	6.74	2.35	4.8	5.83	3.32	89.2	10.84	1.75	0.49	18.9	2.74	0.19	0.07	48.9	1.5	10.96	0.32	5093.16	1289.43	25	7.07
Mélange-5-Bourguignonnes	FLM	2014	1177.52	82.45	297.26	69.26	10.5	8.7	2.2	3.66	10.5	3.54	92.7	9.55	1.68	0.4	19.52	2.43	0.17	0.05	39.86	0.95	9.54	0.31	2683.81	1089.3	10.75	4.6
Mélange-5-Bourguignonnes	FLM	2015	1337.68	114.14	265.36	68.65	10.1	8.78	2.7	2.71	6.2	3.85	93.14	14.35	1.47	0.56	20.64	2.32	0.21	0.07	41.12	1.56	9.89	0.1	3610.41	199.67	14.86	1.39
Mélange-5-Bourguignonnes	FRC	2014	1021.62	139.84	243.38	75.09	9.3	8.51	3	3.91	5	3.91	86.7	16.89	1.53	0.66	17.52	2.31	0.17	0.1	39.94	1.63	9.78	3.27	2338.57	499.24	9.38	2.38
Mélange-5-Bourguignonnes	FRC	2015	773.4	108.68	197.28	61.33	4.6	6.69	0.2	0.99	0.5	1.52	75.74	20.67	1.02	0.41	14	2.64	0.17	0.09	36.47	0.3
Mélange-5-Bourguignonnes	JFB	2014	1277.04	98.47	317.61	56.65	6.33	8.28	0.51	1.53	10.92	4.29	108.55	15.27	2.03	0.58	20.33	2.75	0.13	0.06	42.85	1.63	11.14	0.27	3430.56	376.08	14.67	1.05
Mélange-5-Bourguignonnes	JFB	2015	1297.92	81.03	268.5	59.52	6.7	8.24	0.2	1.41	6.9	3.01	87.72	9.43	1.6	0.32	19.98	2.35	0.19	0.06	46.13	1.97	7.58	0.29	6558.9	49.57	30.25	1.06
Mélange-5-Bourguignonnes	JSG	2014	1494.64	98.78	287.83	70.64	7	7.12	2	3.18	7.07	3.95	103.23	14.53	1.91	0.5	22.01	2.06	0.15	0.06	46.11	1.17	11.48	0.71	7302.14	1597.59	33.66	7.22
Mélange-5-Bourguignonnes	JSG	2015	1302.39	110.26	85.57	6.65	6.47	8.33	2.27	2.51	4.73	2.31	85.57	6.65	1.34	0.3	19.21	1.49	0.2	0.06	46.45	2.39	10.03	1.24	6601.84	1557.22	30.43	5.93
Mélange-5-Bourguignonnes	RAB	2014	1736.7	106.19	405.3	77.28	9.15	6.94	3.4	3.47	5	1.04	99.9	15.42	1.92	0.36	20.28	1.84	0.16	0.04	41.54	0.37	11.61	0.27	7006.22	542.8	29.11	2.51
Mélange-5-Bourguignonnes	RAB	2015	1482.98	106.69	297.6	67.96	10.8	8.04	4.3	5.05	8.1	4.83	92.84	11.15	2.11	0.49	21.44	2.13	0.17	0.05	49.2	1.43	8.59	0.12	6467.72		31.17
Mélange-du-Sud-Ouest	CHD	2014	1129.34	79.42	271	59.98	13.6	7.63	8.9	5.18	10.3	4.21	102	15.06	2.58	0.76	19.61	2.47	0.15	0.07	50.67	0.47	11.59	0.19	4370.55	196.68	22.15	1.2
Mélange-du-Sud-Ouest	CHD	2015	1078.67	95.22	264.06	57.79	12.9	7.83	6.3	4.82	5.2	3.91	85.1	10.92	1.88	0.52	19.54	2.09	0.2	0.06	51.37	0.19	9.72	0.09	6619.14	575.24	34	2.83
Mélange-du-Sud-Ouest	FLM	2014	1180.64	108.8	310.38	50.42	9.9	7.18	9.9	6.35	9.5	3.94	95.44	14.02	2.01	0.55	20.36	2.39	0.18	0.05	45.92	0.04	9.56	0.07	3462.69	64.74	15.9	0.28
Mélange-du-Sud-Ouest	FLM	2015	1399.71	119.87	289.6	71.19	10.2	9.46	9.49	8.31	8.47	4.23	108.31	14.39	2.07	0.56	21.18	1.84	0.17	0.07	48.58	1.46	9.93	0.28	4139.84	364.66	20.14	2.38
Mélange-du-Sud-Ouest	FRC	2014	1065.31	132.15	207.24	75.22	11.3	8.62	9.2	8.53	8.2	5.6	98.78	14.6	1.92	0.85	19.53	2.63	0.15	0.1	41.11	0.87	10.62	0.25	2102.71	309.26	8.63	1.09
Mélange-du-Sud-Ouest	FRC	2015	716.08	95.54	162.68	46.7	11.8	7.41	6.5	5.18	4.8	4.16	76.28	12.22	1.22	0.38	15.16	2.32	0.21	0.09	38.62	1.72
Mélange-du-Sud-Ouest	JFB	2014	1153.4	129.26	277.96	73.96	12.04	8.72	8.06	7.28	9.8	4.67	104.8	20.25	2.26	0.79	20.14	2.87	0.15	0.07	44.55	1.79	11.15	0.49	3923.78	1239.04	17.37	4.82
Mélange-du-Sud-Ouest	JFB	2015	1333.66	75.38	279.08	53.73	10.6	8.84	5.7	4.85	8.8	5.4	91.6	13.55	2.03	0.64	20.86	1.97	0.21	0.08	51.24	0.57	7.47	0.64	6345.89	623.16	32.5	2.83
Mélange-du-Sud-Ouest	JSG	2014	1440.2	104.98	248.39	72.27	11.67	7.59	9	5.81	8.4	4.04	110.6	14.59	2.18	0.58	21.96	2.45	0.17	0.05	48.35	2.47	11.95	1.73	9201.25	639.43	44.49	3.93
Mélange-du-Sud-Ouest	JSG	2015	1322.55	105.79	88.32	11.87	11.35	8.89	6.15	4.72	7.16	3.71	88.01	12.07	1.66	0.48	19.65	2.11	0.24	0.07	49.35	1.98	8.41	0.62	7467.43	488.13	36.79	1.33
Mélange-du-Sud-Ouest	RAB	2014	1614.1	118.32	323.1	68.56	10.94	6.97	6.46	5.45	7.5	3.99	113.96	12.38	2.51	0.5	22.29	2.71	0.14	0.05	46.96	4.01	12.59	0.43	8101.16	1863.06	37.67	5.5
Mélange-du-Sud-Ouest	RAB	2015	1376.74	99.08	293.7	54.02	12.8	7.84	6.9	5.61	7.6	3.81	104.48	15.83	2.72	0.63	21.28	2.04	0.14	0.05	51.19	1.46	8.57	0.59	5315.9		26.67
Pop-Dynamique-2	CHD	2014	1098.58	74.62	234.3	58.26	12	9.26	10	4.04	11.2	6.02	105.08	21.1	2.64	0.69	21.08	2.42	0.14	0.05	46.4	0.48	10.61	1.98	4058	1260.65	18.8	5.66
Pop-Dynamique-2	CHD	2015	1068.44	95.42	262.16	56.93	10.5	8.76	10.9	3.87	6.9	5.24	88.8	13.78	1.78	0.73	19.9	1.47	0.23	0.08	47.39	1.31	10.14	1.09	7830.54	1708.01	37	7.07
Pop-Dynamique-2	FLM	2014	1110.22	79.13	251.14	76.59	7.86	8.42	15	7.07	13.27	4.02	105.9	13.39	2.58	0.69	20.88	1.93	0.14	0.05	43.83	3	8.74	0.04	2212.42	348.76	9.75	2.19
Pop-Dynamique-2	FLM	2015	1327.08	83.38	281.74	52.58	12.24	8.17	10.7	3.03	10.2	4.51	105.56	14.73	1.94	0.62	21.92	2.17	0.2	0.07	43.71	0.36	9.29	0.21	5796.43	328.17	25.34	1.64
Pop-Dynamique-2	FRC	2014	1049.76	108.85	213.18	65.23	9.1	8.85	10.9	5.41	9.1	5.69	101.5	16.64	1.91	0.94	20.46	2.75	0.18	0.09	39.28	0.92	10.9	0.09	2003.16	566.73	7.89	2.41
Pop-Dynamique-2	FRC	2015	799.38	78.09	188.24	46.44	12.3	9.27	10.5	3.39	4.8	2.85	78.12	9.14	1.27	0.43	15.62	2.55	0.19	0.07	37.98	0.33
Pop-Dynamique-2	JFB	2014	1191.18	110.05	266.55	102.54	10.92	8.46	10.61	4.16	11.84	4.64	112.86	14.66	2.8	0.72	21.43	2.11	0.11	0.06	44.59	2.08	10.76	0.56	4500.69	699.73	19.99	2.18
Pop-Dynamique-2	JFB	2015	1272.3	67.44	282.68	41.9	8.5	9.6	8.8	3.43	8.2	5.23	90.94	10.74	1.99	0.45	20.84	1.62	0.18	0.07	47.59	0.98	8.54	0.39	6740.8	539.94	32.05	1.91
Pop-Dynamique-2	JSG	2014	1419.11	91.14	246.11	68.08	12.07	7.45	14.27	3.36	8.2	4.98	106.2	15.5	2.37	0.54	22.93	2.53	0.17	0.05	49.46	1.34	11.7	0.74	9004.1	963.67	44.44	3.63
Pop-Dynamique-2	JSG	2015	1295.96	116.04	94.71	12.65	13.45	8.68	10.47	3.43	6.69	4.08	94.71	12.65	1.95	0.49	20.01	1.87	0.2	0.06	50.28	0.75	10.3	0.14	6879.28	1678.27	34.53	8.04
Pop-Dynamique-2	RAB	2014	1488.22	94.85	275.72	81.76	12.23	8.59	9.79	7.29	14.89	4.6	118.98	17.99	2.91	0.69	22.64	2.82	0.13	0.05	47.9	2.91	12.09	0.35	10407.5	1008.61	50	7.86
Pop-Dynamique-2	RAB	2015	1334.54	85.01	290.4	57.41	13.3	7.33	12.7	2.71	10.1	5.49	99.18	12.35	2.57	0.57	21.84	1.8	0.17	0.05	48.26	2.2	8.39	0.56	6646.61	290.4	32.04	0.06
Renan	CHD	2014	705.98	63.46	119.4	27.33	19.8	0.99	0.8	1.85	11.8	5.03	90.2	10.37	2.3	0.49	17.61	2.3	0.1	0.04	52.94	1.17	11.42	0.79	3340.11	567.97	17.65	2.62
Renan	CHD	2015	664.46	50.86	122.2	29.69	15.8	2.55	4.9	0.71	3.9	2.53	77.62	8.49	1.41	0.47	17.28	1.44	0.24	0.09	52.33	1.33	8.98	0.03	2293.73	58.48	12	0
Renan	FLM	2014	684.98	43.07	108.68	30.57	16.4	3.36	2.7	2.71	8	3.78	83.28	12.21	2.23	0.73	17.62	1.79	0.14	0.06	49.76	1.27	10.61	0.77	2671	622.51	13.25	2.76
Renan	FLM	2015	932.02	54.06	160.8	19.64	19.5	1.82	4.6	1.98	8.9	4.66	97.68	9.92	2.42	0.68	19.24	1.04	0.12	0.07	51.69	0.04	8.63	0.37	6638.27	489.11	34.31	2.5
Renan	FRC	2014	703.14	128.57	90.56	38.29	14.7	3.9	2.88	3.12	4.39	3.93	95.9	20.42	1.95	0.89	19.35	2.77	0.18	0.11	45.81	1.68	10.8	1.92	2750.19	1676.47	12.64	7.57
Renan	FRC	2015	466.6	49.97	47.92	25.42	19.7	1.2	1.4	2.27	0.9	1.94	65.04	11.96	1.12	0.45	13.74	2.1	0.22	0.1	41.19	2.23
Renan	JFB	2014	774.9	50.81	106.52	41.05	18.4	2.36	3.9	2.09	11.6	4.79	102.84	17.17	2.99	0.73	20.04	2.04	0.09	0.08	48.64	1.12	12.01	0.68	5184.43	2148.12	25.34	11.03
Renan	JFB	2015	747.86	35.88	99.8	20.67	15.9	2.41	0	0	5.3	3.97	90.92	7.53	2.44	0.48	19.64	1.91	0.17	0.06	52.41	0.07	7.54	0.09	5895.94	8.27	30.9	0
Renan	JSG	2014	920.87	72.24	142.97	33.81	16.6	3.41	3.13	2.57	3.8	2.71	102.19	14.91	2.33	0.64	20.28	1.53	0.15	0.07	52.97	0.25	13.33	0.6	11561	1909.37	61.2	9.85
Renan	JSG	2015	791.76	73.02	88.75	17.73	19.6	1.97	3.93	2.22	4.4	3.76	88.75	17.73	1.73	0.48	18.48	1.57	0.2	0.06	51.55	0.59	7.99	0.07	7298.31	2075.19	37.69	11.06
Renan	RAB	2014	953.82	44.06	159.58	38.31	16.9	3.48	0	0	12.8	5.64	97.78	12.37	2.34	0.5	20.06	2.31	0.16	0.06	49.25	3.6	11.96	0.2	10090.5	3226.71	49.11	12.26
Renan	RAB	2015	879.04	45.94	149.33	26.89	17.3	3.23	1.6	2.36	3.7	3.32	92.58	7.45	2.35	0.58	17.84	1.5	0.12	0.05	52.14	1.92	8.24	0.49	8106.23		41.17
Rocaloex	CHD	2014	1132.04	77.49	263.4	54.98	10.9	7.74	10.5	6.57	9.1	4.48	99.7	15.04	2.42	0.64	19.06	2.33	0.13	0.07	49.85	1.56	12.33	0.9	3540.73	11.3	17.65	0.49
Rocaloex	CHD	2015	1131.72	99.54	267.28	58.45	13.16	8.08	6.53	5.02	6.94	5.19	88.46	13.7	1.88	0.6	18.9	1.6	0.21	0.08	49.4	1.22	10.44	0.88	5883.22	1004.41	29	4.24
Rocaloex	FLM	2014	1151.72	113.2	296.36	56.18	11.3	8.26	14.3	6.47	13	4.84	97.86	12.87	2.42	0.71	20.74	2.7	0.13	0.07	45.65	0.47	9.65	0.25	2684.69	290.87	12.25	1.2
Rocaloex	FLM	2015	1352.18	113.12	275.46	46.55	10.6	8.61	9.5	7.23	9.1	4.7	101.8	15.47	1.91	0.63	20.48	1.87	0.19	0.09	46.51	0.12	9.79	0	5105.79	153.72	23.75	0.78
Rocaloex	FRC	2014	974.42	132.18	192.74	74.69	9.1	8.67	9.2	7.02	6.8	4.01	90.6	23.42	1.59	0.91	19.45	2.72	0.23	0.11	41.28	0.37	11.08	0.82	2071.74	70.13	8.55	0.21
Rocaloex	FRC	2015	773.58	120.24	167.78	52.16	12.4	7.64	9.1	6.12	4.4	4.36	83.64	16.98	1.4	0.48	15.84	3.19	0.18	0.09	38.73	0.68
Rocaloex	JFB	2014	1159.94	117.15	295.92	66.05	11.5	8.35	8.6	5.72	12	5.62	109.08	18.99	2.54	0.8	19.58	2.65	0.14	0.08	44.78	0.09	11.77	0.97	4529.9	413.54	20.28	1.81
Rocaloex	JFB	2015	1247.48	82.34	232.54	40.34	9.7	8.77	9.4	5.59	8	5.05	91.34	14.29	2.15	0.65	20.6	1.9	0.2	0.06	51.77	1.05	7.98	0.3	6765	465.09	35	1.7
Rocaloex	JSG	2014	1369.33	113.22	220.99	63.77	8.53	7.25	8.33	6.75	7.47	4.82	112.21	23.02	2.22	0.7	22.24	2.43	0.16	0.07	48.07	1.53	12.91	0.71	7208.65	1025.53	34.68	5.21
Rocaloex	JSG	2015	1219.39	122.89	85.39	16.31	8.53	8.09	7.53	6.49	7	4.58	85.39	16.31	1.62	0.44	18.27	2.15	0.22	0.07	48.1	1.16	9.61	0.22	6406.12	865.13	30.77	3.67
Rocaloex	RAB	2014	1542.16	118.38	330.84	71.39	9.79	8.27	6.81	6.12	10.32	5.36	112.24	20.78	2.64	0.7	22.13	2.76	0.15	0.06	46.68	3.95	12.69	0.29	10105.8	889.04	47	0.16
Rocaloex	RAB	2015	1388.96	94.77	281.9	55.91	12.2	8.09	9.6	5.42	7.9	4.75	100.45	16.18	2.36	0.55	21.28	2.13	0.19	0.07	50.59	1.8	8.81	0.24	6198.72	163.35	31.38	1.94
Rouge-du-Roc	CHD	2014	1139.08	79.34	285.08	53.52	19.3	2.02	14.5	3.07	8.4	3.26	104.68	16.39	2.5	0.63	18.8	2.13	0.18	0.06	48.75	0.97	13.44	0.82	3599.03	1117.54	17.6	5.8
Rouge-du-Roc	CHD	2015	1148.6	113.09	293.14	43.56	19.24	3.16	10.65	4.16	8.26	4.97	94.7	14.77	1.97	0.57	18.26	1.82	0.23	0.07	48.88	1.29	11.64	1.05	6155.59	1320.39	30	5.66
Rouge-du-Roc	FLM	2014	1199.64	80.69	315.8	43.8	19.1	2.61	16.6	2.93	10.9	3.45	98.42	11.85	2.29	0.61	19.18	1.65	0.2	0.06	50.05	0.16	11.06	0.04	2328.3	275.89	11.65	1.34
Rouge-du-Roc	FLM	2015	1454.96	98.93	324.61	49.39	19.4	1.64	14.7	3.97	8.7	5.52	114.53	15.8	2.31	0.52	20.71	1.15	0.2	0.08	49.17	1.14	10.85	0.16	2685.31	791.94	13.25	4.2
Rouge-du-Roc	FRC	2014	1135.24	107.79	270.16	39.42	18.65	3	16.7	3.5	9.2	5.01	113.52	18.45	2.23	1.2	21.12	1.53	0.17	0.09	44.55	5.13	11.09	1.54	2315.75	309.64	11.25	1.05
Rouge-du-Roc	FRC	2015	727.02	94.58	177.43	44.22	18.4	2.56	13	3.19	5.5	3.54	82.94	14.36	1.34	0.49	14.78	2.16	0.25	0.08	38.71	0.2
Rouge-du-Roc	JFB	2014	1258.86	100.96	338.43	52.81	19	3.19	14.2	4.88	9.6	4.83	117.12	20.85	3.09	0.77	20.66	2.37	0.15	0.06	48.2	0.16	12.03	0.48	3998.03	375.07	19.27	1.87
Rouge-du-Roc	JFB	2015	1338.6	67.03	280.34	38.14	19.69	2.14	12.86	2.89	7.35	3.55	102.8	13.2	2.62	0.62	20.41	1.32	0.2	0.06	52.7	2.47	8.46	0.04	5778.79	15.67	30.45	1.34
Rouge-du-Roc	JSG	2014	1441.63	75.17	295.39	57.31	18.47	2.84	13.33	2.89	11.13	4.47	109.62	14.58	2.34	0.51	21.04	1.49	0.18	0.05	47.43	1.13	12.09	1.32	8531.04	2041.83	40.32	8.71
Rouge-du-Roc	JSG	2015	1292.43	90.13	97.68	12.77	19.8	1.73	11.27	2.74	8.2	3.04	98.57	10.27	1.95	0.45	18.93	1.48	0.23	0.05	50.1	1.33	10.38	0.27	5702.97	759.33	28.5	3.09
Rouge-du-Roc	RAB	2014	1691.18	92.75	390.38	44.43	19.59	1.38	12.24	6.21	7.55	5.22	121.08	17.63	2.67	0.54	21.65	2.07	0.17	0.04	48.72	5.87	14.96	0.22	5837.4	3024.73	27.56	11.31
Rouge-du-Roc	RAB	2015	1447.98	129.79	321.02	45.67	19.6	1.37	11.2	3.12	7.7	4.19	114.59	12.5	2.99	0.68	20.18	1.57	0.15	0.06	56.63	1.9	10.33	0.88	4582.23		25.33
Saint-Priest	CHD	2014	1091.76	70.52	272.52	37.18	2.6	2.52	9.7	2.35	7.6	3.53	97.52	10.3	2.43	0.58	20.26	1.64	0.12	0.04	44.2	0.27	11.68	0.07	6107.45	282.43	27	1.41
Saint-Priest	CHD	2015	997.5	102.5	253.16	51.72	2.7	4.31	8.1	4.03	3.3	2.96	81.9	10.19	1.56	0.5	19.46	1.53	0.22	0.08	42.25	1.95	10.1	0.79	5472.74	1256.87	23	4.24
Saint-Priest	FLM	2014	1152.36	52.85	328.46	34.19	4.2	1.85	12.1	2.49	11.2	3.12	97.24	10.76	2.21	0.47	21.1	1.72	0.12	0.05	40.51	2.59	10.31	0.05	3326.65	195.2	13.45	0.07
Saint-Priest	FLM	2015	1307.54	80.18	339.38	33.1	2.6	2.52	10.3	2.75	8	4.29	98.52	11.46	1.65	0.48	21.34	1.53	0.21	0.08	41.25	0.67	10.38	0.64	6220.83	309.59	25.65	0.86
Saint-Priest	FRC	2014	1001.4	118.79	258.3	53.73	1.8	4.26	13.9	4.2	5.4	3.48	89.2	16.91	1.65	0.76	20.52	1.64	0.17	0.09	37.91	2.9	10.28	1.89	1441.78	209.24	5.44	0.37
Saint-Priest	FRC	2015	775.86	89.75	211.3	41.17	3	3.5	10.5	2.53	1.9	2.45	77.94	12.16	1.26	0.47	16.34	1.78	0.16	0.07	34.36	1.57
Saint-Priest	JFB	2014	1205.06	129.52	315.34	65.41	1.6	2.36	13.2	4.82	10.9	4.13	106.69	17.33	2.36	0.72	21.22	2.11	0.12	0.06	40.71	1.84	12.26	0.46	6427.5	841.46	26.09	2.25
Saint-Priest	JFB	2015	1235.96	54.33	309.96	29.94	1.8	3.46	9.3	2.02	4.7	1.87	87.24	10.38	1.75	0.55	20.9	1.31	0.18	0.08	42.38	0.12	9.54	0.38	7043.44	464.4	29.85	2.05
Saint-Priest	JSG	2014	1327.91	73.61	279.24	39.8	1.13	2.91	9.27	1.96	4.33	3.11	104.35	14.1	1.86	0.41	22.55	1.34	0.14	0.06	42.41	1.17	13.38	0.74	8097.17	1953.59	34.21	7.43
Saint-Priest	JSG	2015	1244.57	88.8	85.47	7.62	0.53	2.54	11	3.77	3.53	3.26	85.47	7.62	1.37	0.33	20.47	1.23	0.21	0.07	41.39	0.88	10.98	0.87	6478.45	1013.14	26.79	4.11
Saint-Priest	RAB	2014	1453.12	58.73	356.48	36.74	3.67	5.47	12.04	4.32	10.41	3.66	111.68	12.12	2.78	0.41	22.51	1.5	0.11	0.03	46.63	0.5	12.64	0.11	10486.3	180.63	48.89	0.31
Saint-Priest	RAB	2015	1291.04	67.82	332.14	34.8	0.8	1.85	11.6	2.36	3.9	2.73	90.06	7.72	2.12	0.33	21.16	1.22	0.16	0.04	44.9	0.8	8.18	0.07	6635.84		29.42
Savoysone	CHD	2014	1070.94	72.92	272.64	35.61	5.2	1.76	13.57	6.12	5.61	3.48	85.86	9.54	1.93	0.42	16.41	2	0.1	0.06	47.34	1.01	12.47	0.09	5567.27	896.73	26.4	4.81
Savoysone	FLM	2014	1213.34	68.25	329.58	40.49	4.8	0.99	17.5	3.68	12.4	3.39	99.12	14.44	2.27	0.58	18.78	1.67	0.11	0.06	44.07	1.4	9.82	0.08	3732.29	747.83	16.5	3.82
Savoysone	FLM	2015	1397.27	85.19	296.69	46.81	5.1	2.14	14.6	4.38	7.8	4.86	104.27	14.76	1.74	0.5	19.64	1.22	0.13	0.07	43.24	0.88	10.08	0.04	5872.26	283.46	25.38	0.71
Savoysone	FRC	2014	1090.73	152.44	250	69.48	2.5	2.53	14	6.55	7.4	4.43	100.84	21.64	1.77	0.76	18.08	2.67	0.11	0.1	38.95	2.25	11.22	0.47	2325.65	548.22	9.12	2.66
Savoysone	FRC	2015	766.78	101.65	199.49	53.01	4.36	1.69	11.91	5.27	2.34	2.52	80.28	13.94	1.23	0.47	14	2.13	0.13	0.09	36.81	2.56
Savoysone	JFB	2014	1300.94	124.74	336.74	40.42	3.9	3.24	13.4	5.84	12.4	4.19	119.82	16.63	2.83	0.58	19.34	2.98	0.04	0.04	44.5	0.15	11.4	0.12	4098.25	727.15	18.23	3.17
Savoysone	JFB	2015	1262.28	82.2	275.88	43.58	4.7	1.57	12.5	4.32	8.8	3.85	92.38	9.16	1.92	0.42	19.44	1.45	0.15	0.06	48.22	1.55	8.33	0.06	6769.87	60.31	32.65	1.34
Savoysone	JSG	2014	1436.57	86.42	255.32	44.83	4.53	1.46	13.87	6.29	8.33	3.42	125.15	14.22	2.33	0.5	21.17	1.2	0.09	0.05	46.39	0.96	13.49	0.97	9134.74	1376.07	42.45	7.11
Savoysone	JSG	2015	1328.54	104.89	89.57	10.71	5.87	5.83	9.8	4.75	6.53	3.58	89.57	10.71	1.53	0.43	18.97	1.79	0.2	0.07	46.3	1.47	9.15	0.47	7649.43	377.32	35.43	2.33
Savoysone	RAB	2014	1634.6	71.54	357.9	60.92	2.92	2.49	7.81	6.91	7.4	3.72	111.16	20.23	2.76	0.52	20.38	1.44	0.11	0.05	47.62	1.36	11.94	0.18	9396.84	1127.21	44.67	4.09
Savoysone	RAB	2015	1358.8	79.5	312.37	40.57	5	1.43	4	5.53	3.3	3.59	90.26	11.76	2.33	0.63	19.56	1.37	0.14	0.07	46.86	2.42	8.05	0.82	7198.23		32.5
